# Supplementary material for: Deep Hybrid Learning Prediction of Patient-Specific Quality Assurance in Radiotherapy: Implementation in Clinical Routine
Source: MDPI journal article supplement (doi:10.3390/diagnostics13050943), 2023-03-02
Supplement: s1 [file s1]

## Supp Table 1:

| Tumor location | Mean Gamma Threshold |
|----------------|----------------------|
| Pelvis         | $0.37 \pm 0.044$     |
| Breast         | $0.44 \pm 0.055$     |
| H&N            | $0.43 \pm 0.053$     |
| Brain          | $0.42 \pm 0.061$     |
| Thorax         | $0.41 \pm 0.051$     |
| Digestive      | $0.36 \pm 0.040$     |
| Rachis         | $0.38 \pm 0.043$     |
| Other          | $0.41 \pm 0.061$     |
| Member         | $0.43 \pm 0.052$     |
| Skin           | $0.46 \pm 0.065$     |
| All            | $0.42 \pm 0.056$     |

Gamma mean threshold for each tumor location

## Supp Table 2:

| Machine learning models | Training score | Validation score |
|-------------------------|----------------|------------------|
| LinearDiscriminant      | 0.73           | 0.59             |
| Ridge                   | 0.73           | 0.59             |
| Kneighbors              | 0.94           | 0.82             |
| GaussianNB              | 0.68           | 0.64             |
| DecisionTree            | 0.83           | 0.76             |
| SVC                     | 0.87           | 0.75             |
| SGD                     | 0.73           | 0.60             |
| LinearRegression        | 0.24           | 0                |
| RandomForestClassifier  | 1              | 0.90             |

ML classifier models training and validation score (for “all tumor location”)

## Supp FIGURE 1:

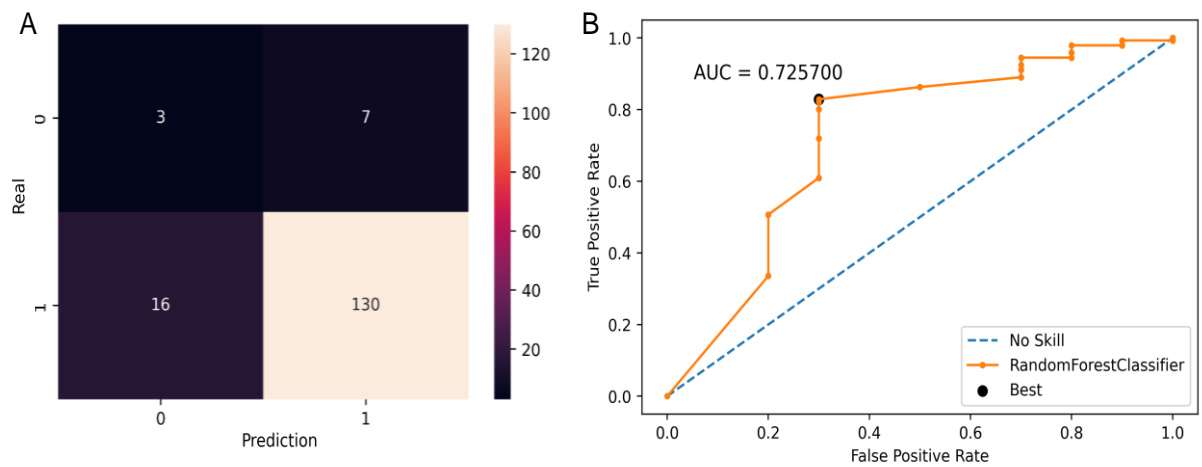

Confusion matrix (A) and ROC curve (B) for the global ML model applied to the Brain tumor RT plans

### Supp Table 3 :

| TP      | TN     | FP     | FN      | Sensitivity | Specificity |
|---------|--------|--------|---------|-------------|-------------|
| 83.33 % | 1.92 % | 4.49 % | 10.26 % | 89.04 %     | 30 %        |

Performance for the global ML model applied to the Brain tumor RT plans

## Supp FIGURE 2:

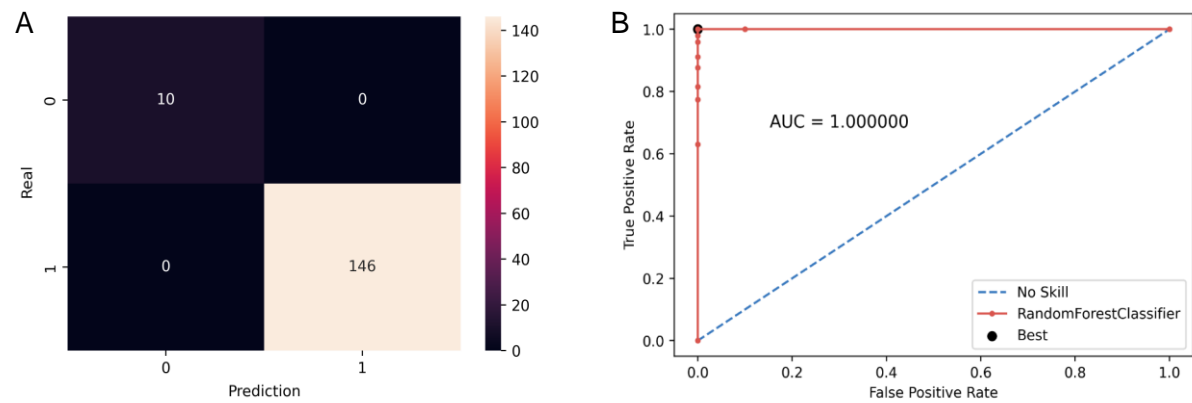

Confusion matrix (A) and ROC curve (B) the brain specific ML model

## Supp Table 4 :

| TP      | TN     | FP  | FN  | Sensitivity | Specificity |
|---------|--------|-----|-----|-------------|-------------|
| 93.59 % | 6.41 % | 0 % | 0 % | 100 %       | 100 %       |

Performance of the brain specific ML model

### Supp FIGURE 3:

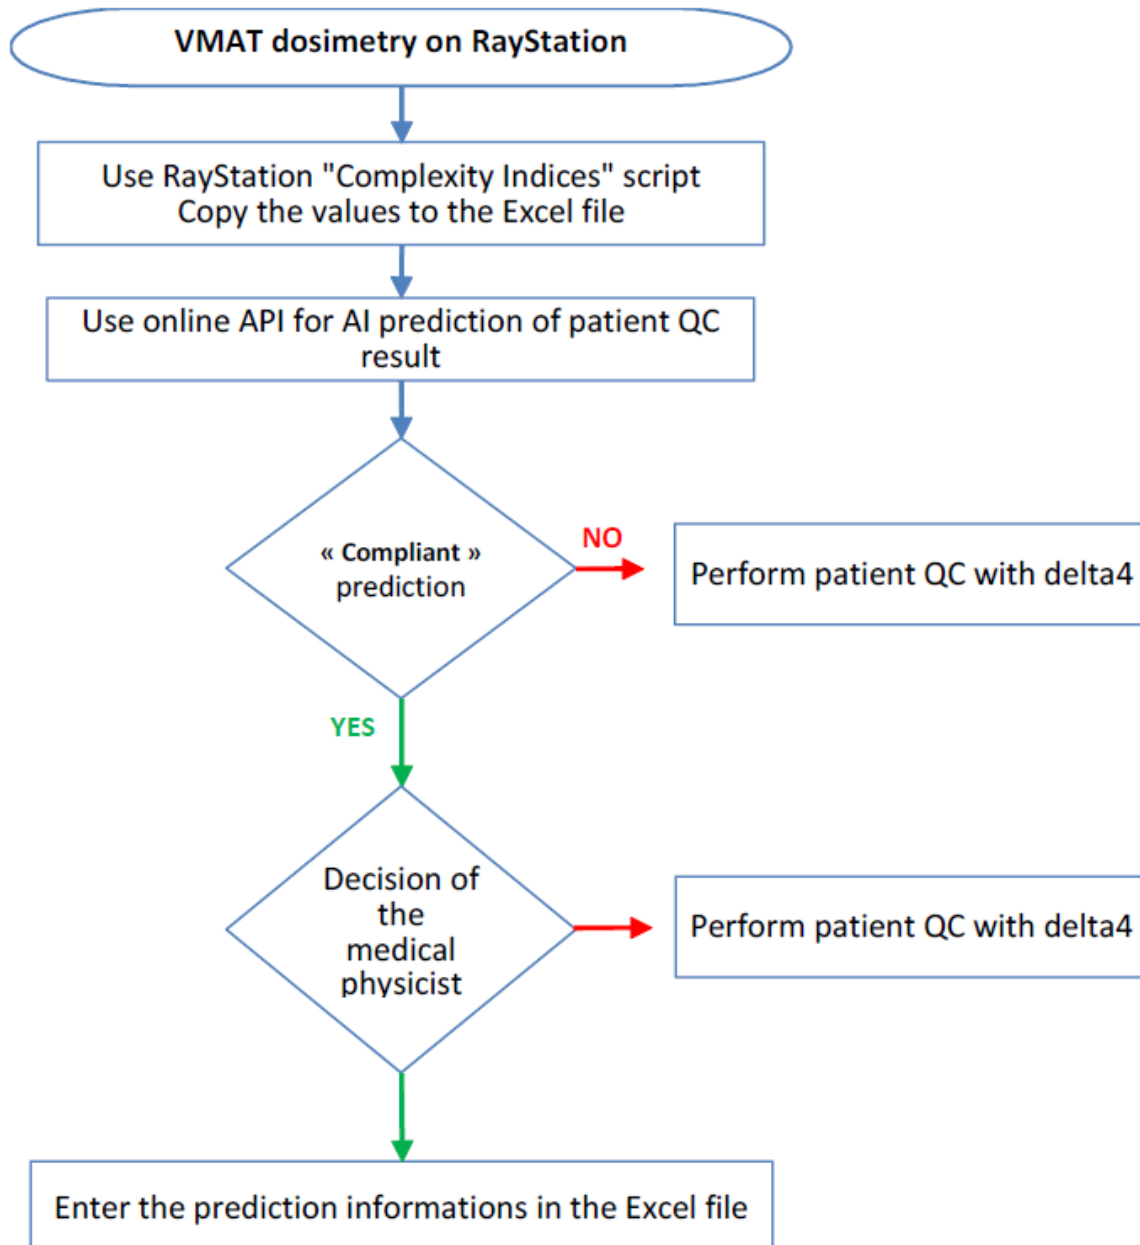

Example of workflow in clinical practice

## Supp FIGURE 4:

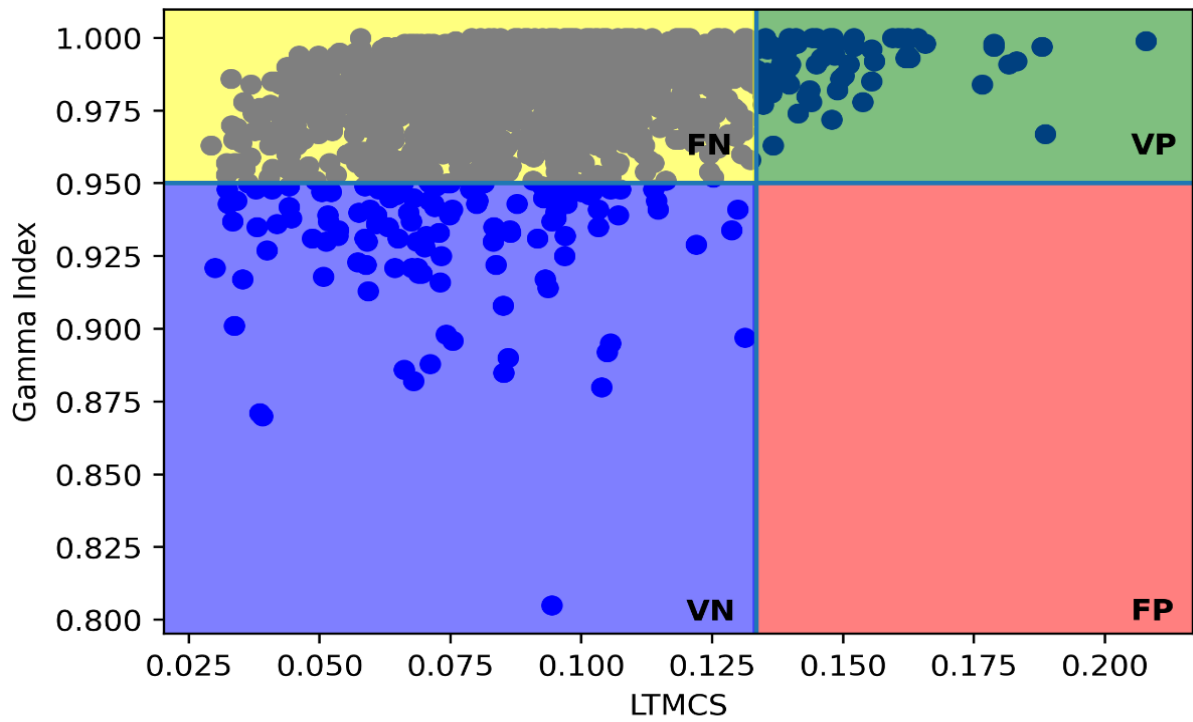

Example of using LTMCS threshold value to discriminate conformance and non-conformance QC



## Supp Table 5 :

| TP     | TN     | FP  | FN      | Sensitivity | Specificity |
|--------|--------|-----|---------|-------------|-------------|
| 3.98 % | 7.22 % | 0 % | 88.81 % | 4.28 %      | 100 %       |

Performance of the brain specific ML model

## Supp FIGURE 5:

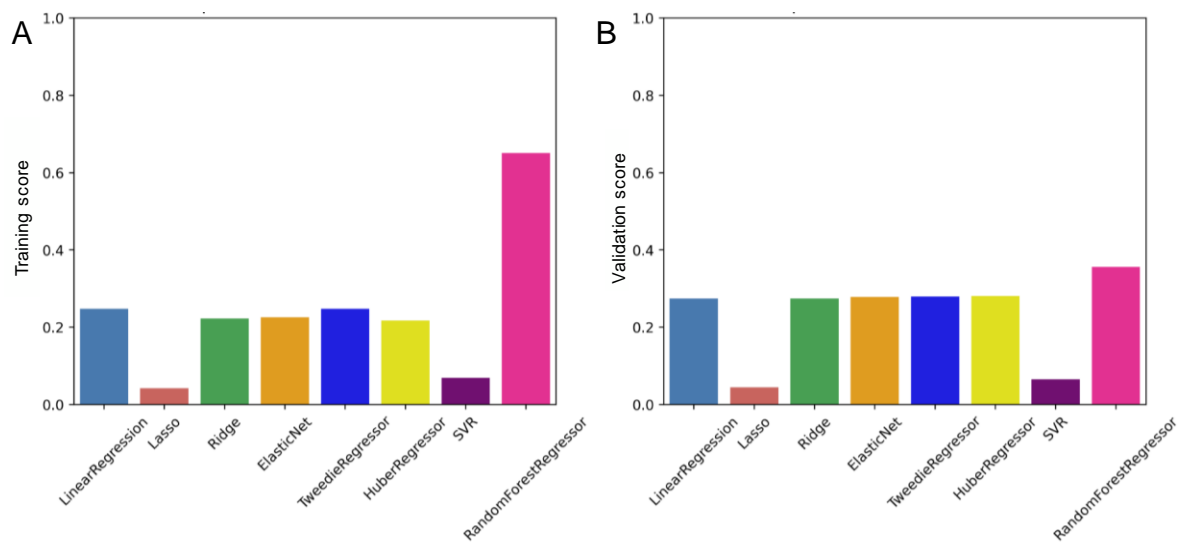

Performance of regression machine learning models, training score (A) and validation score (B)
